# Supplementary material
Source: publisher figshare collection journal article supplement (https://aacr.figshare.com/articles/dataset/_/22553481)
Supplement: Supplementary file 1 [file 40020897]

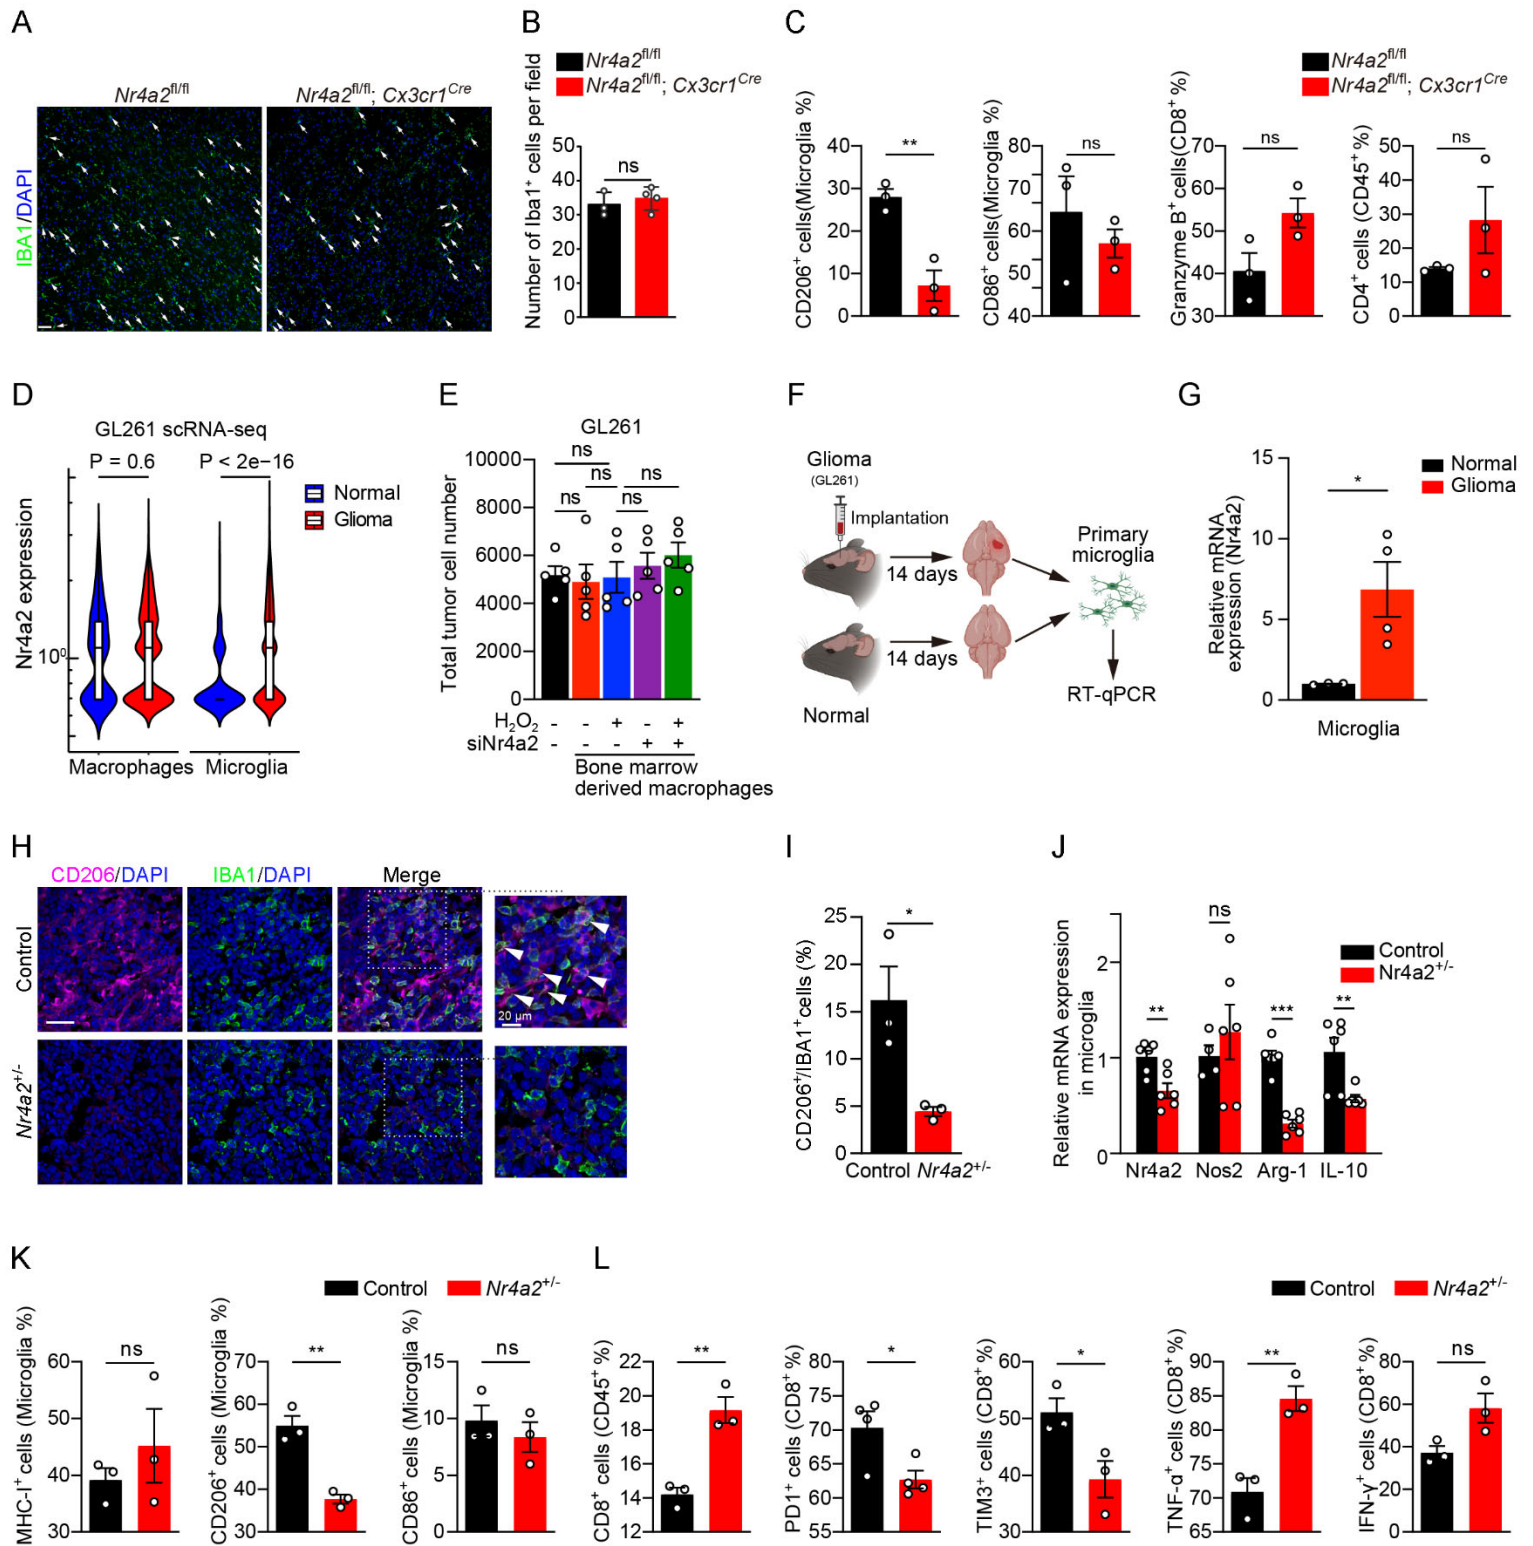

**Supplementary Figure S5. Genetic knockout of *Nr4a2* in microglia reverses immunosuppressive state, related to Figure 6**

(A-B) Immunofluorescence staining for microglia (IBA1) on brain tissue of *Nr4a2<sup>fl/fl</sup>* and *Nr4a2<sup>fl/fl</sup>Cx3cr1<sup>cre</sup>* mice. Scale bars, 50  $\mu$ m (A). Number of IBA1<sup>+</sup> cells per field was shown (B).

(C) Flow cytometry analysis to examine the proportion of CD206<sup>+</sup> and CD86<sup>+</sup> cells in microglia, proportion of granzyme B<sup>+</sup>CD8<sup>+</sup> T cells and proportion of CD4<sup>+</sup> T cells in CD45<sup>+</sup> cells from glioma tissue of *Nr4a2<sup>fl/fl</sup>* and *Nr4a2<sup>fl/fl</sup>Cx3cr1<sup>cre</sup>* glioma-bearing mice.

(D) Violin plot comparing *Nr4a2* expression in macrophages and microglia from normal brain and glioma-bearing brain in our GL261 scRNA-seq data, respectively.

(E) NR4A2-knockdown of macrophages had no effect on proliferation of glioma. Bone marrow derived macrophages transfected with siNr4a2 for 48 hours were treated by H<sub>2</sub>O<sub>2</sub> (500  $\mu$ M) for 12 hours. Conditional medium from treated macrophages was used to incubate with glioma cells (GL261) for 12 hours. Cell proliferation of glioma cells were assessed by cell counts.

(F) A schematic model to evaluate the *Nr4a2* expression of microglia isolated from tumor tissues of GL261 glioma-bearing mice and the cortex of control mice.

(G) Relative expression of *Nr4a2* in microglia isolated from glioma tissue compared with microglia from cortex of control mice.

(H, I) Immunofluorescence staining for CD206 of microglia on brain sections from *Nr4a2<sup>+/-</sup>* and control glioma-bearing mice (H). Scale bars, 50  $\mu$ m. Proportions of CD206<sup>+</sup>IBA1<sup>+</sup> cells (I) were shown.

(J) Relative expression levels of immunoactivation marker (*Nos2*) and immunosuppression marker (*Arg-1* and *IL-10*) in primary microglia isolated from *Nr4a2<sup>+/-</sup>* mice and control glioma-bearing mice.

(K) Flow cytometry analysis of CD206, CD86 and antigen presentation maker (MHC-I) of microglia in respective group.

(L) Flow cytometry analysis to test immune checkpoint and cytotoxic functions of CD8<sup>+</sup> T cells in respective group.

Data are shown as mean  $\pm$  SEM. In (E), P value was calculated using one-way ANOVA

analysis. In (B), (C), (D), (G), (I), (J), (K) and (L), P value was calculated using the two-tailed Student's t test. \* $p < 0.05$ , \*\* $p < 0.01$ , \*\*\* $p < 0.001$ .
